# Supplementary material for: Sex Disparities in the Treatment and Control of Cardiovascular Risk Factors in Type 2 Diabetes
Source: Oxford University Press journal article supplement (doi:10.2337/dc08-0194), 2008-06-07
Supplement: dc080194-sup-online_appendix_table_a1.doc [file dc080194-sup-online_appendix_table_a1.doc]

**Online Appendix Table A1:** Characteristics, diabetes duration and treatment* of diabetic men and women stratified by history of cardiovascular disease (CVD)

|  | With CVD | | Without CVD | |
| --- | --- | --- | --- | --- |
|  | Men  (*n* = 9,521)  % | Women  (*n* = 8,050)  % | Men  (*n* = 12,417)  % | Women  (*n* = 14,905)  % |
| Age (years) |  |  |  |  |
| 20-44 | 1.1 | 0.6 | 6.6 | 4.7 |
| 45-64 | 41.9 | 25.1 | 58.7 | 47.6 |
| ≥ 65 | 57.0 | 74.3 | 34.7 | 47.7 |
| Diabetes treatment |  |  |  |  |
| Diet only | 12.4 | 11.3 | 16.0 | 16.7 |
| Oral agents only | 67. 6 | 66.8 | 65.3 | 65.3 |
| Oral agents and insulin | 4.3 | 4.4 | 2.5 | 3.0 |
| Insulin only | 6. 7 | 6.8 | 3. 6 | 3.9 |
| Time since diabetes diagnosis (years) | |  |  |  |
| < 1 | 10.9 | 9.0 | 21.1 | 19.2 |
| 1-4 | 25.4 | 21.5 | 32.4 | 29.2 |
| 5-9 | 30.3 | 28.3 | 26.2 | 27.1 |
| ≥ 10 | 29.6 | 37.4 | 17.0 | 20.9 |
| Current cigarette smoking | 18.8 | 7.6 | 23.2 | 11.7 |
| Body mass index, kg/m2 |  |  |  |  |
| Mean ± SD | 28.4 ± 4.0 | 28.7 ± 4.9 | 28.8 ± 4.3 | 29.3 ± 4.0 |

*Total patients included *n* = 44,893. In groups not adding up to 100% data were missing for the respective parameter.
