# Supplementary material for: Sex Disparities in the Treatment and Control of Cardiovascular Risk Factors in Type 2 Diabetes
Source: Oxford University Press journal article supplement (doi:10.2337/dc08-0194), 2008-06-07
Supplement: dc080194-sup-online_appendix_table_a2.doc [file dc080194-sup-online_appendix_table_a2.doc]

**Online Appendix Table A2:** Estimated probabilities and approximate risk differences (Nurminen-Miettinen) and 95% CI (Koopman) between men and women with type 2 diabetes for cardiovascular disease (CVD) risk factors not under control as well as for intensity of medication management for each CVD risk factor among patients with levels not under control (unadjusted estimates using the male gender as the referent).*

|  | **With CVD** | | | | **Without CVD** | | | |
| --- | --- | --- | --- | --- | --- | --- | --- | --- |
|  | Estimated probability | | Risk difference  % | 95% CI | Estimated probability | | Risk difference  % | 95% CI |
|  | Men  % | Women  % |  |  | Men  % | Women  % |  |  |
| **CVD risk factors not in control** | |  |  |  |  |  |  |  |
| SBP ≥ 140 mmHg | 62.3 | 66.4 | 4.1 | 2.8 to 5.4 | 61.4 | 63.1 | 1.7 | 0.4 to 3.1 |
| LDL-C ≥ 130 mg/dl | 49.8 | 56.8 | 6.9 | 5.6 to 8.3 | 54.9 | 59.5 | 4.6 | 3.3 to 6.0 |
| HbA1c ≥ 8% | 26.4 | 27.1 | 0.7 | –0.6 to 1.9 | 22.4 | 22.6 | 0.1 | –1.0 to 1.3 |
| **Intensity of medication management** | |  |  |  |  |  |  |  |
| ≥ 2 antihypertensive agents | 54.2 | 57.1 | 3.0 | 1.6 to 4.3 | 25.4 | 31.3 | 5.9 | 4.6 to 7.1 |
| ≥ 1 lipid-lowering drug | 48.6 | 41.8 | 6.7 | –8.1 to –5.3 | 24.1 | 23.8 | –0.3 | –1.4 to 0.9 |
| ≥ 2 oral antihyperglycemic agents or insulin | 46.8 | 49.6 | 2.9 | 1.5 to 4.3 | 35.9 | 34.2 | –1.6 | –3.0 to –0.3 |

* Presented are the unadjusted estimated probabilities of having modifiable CVD risk factors not in control (upper part) or receiving more intense medication treatment (lower part), because management of CVD risk factors in patients with diabetes are normative standards of quality of care that are relevant for all of the patients, regardless of demographics or clinical characteristics (1,2). The outcomes were analyzed as binary variables (≥ 140 vs. < 140 mmHg for SBP; ≥ 130 vs. < 130 mg/dl for LDL-C; and ≥ 8.0 vs. < 8.0% for HbA1c) according to the levels considered not in control and therefore requiring more action as recommended by the ADA. More intense medication management was defined as the use of two or more drug classes of antihypertensive agents for hypertension; of one or more lipid-lowering agents for lipid management; and of two or more oral agents or insulin for antihyperglycemic treatment.

1. American Diabetes Association: Standards of medical care in diabetes--2008. *Diabetes Care* 31 Suppl 1:S12-S54, 2008

2. Executive Summary of The Third Report of The National Cholesterol Education Program (NCEP) Expert Panel on Detection, Evaluation, And Treatment of High Blood Cholesterol In Adults (Adult Treatment Panel III). *JAMA* 285:2486-2497, 2001
